# Supplementary material for: Mutations in NSUN3, a Mitochondrial Methyl Transferase Gene, Cause Inherited Optic Neuropathy
Source: MDPI journal article supplement (doi:10.3390/genes15050530), 2024-04-24
Supplement: s1 [file s1]

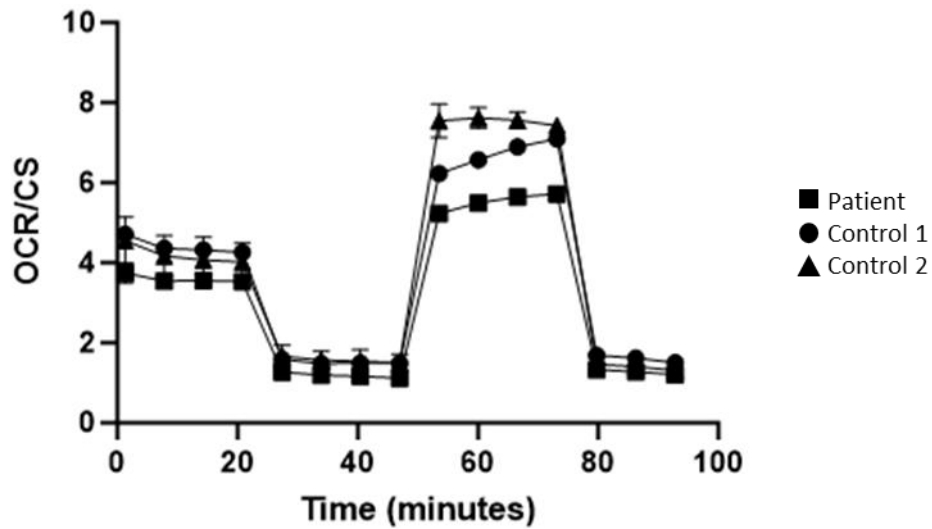

**Supplementary Figure S1.** Whole Seahorse assay. Results of oxygen consumption rates (OCR) normalized based on citrate synthase activity, shown in a typical Seahorse graph. The results are the averages of 6 wells per cell line. The first 4 datapoints represent the basal oxygen consumption rates. The next 4 datapoints are the OCR in the presence of oligomycin, followed by 4 measurements in the presence of 6 micromolar FCCP resulting in the maximum OCR values shown in Figure 3. The final three datapoints show the OCR in the presence of antimycin A + rotenone.
